# Supplementary material for: Structure induced activity enhancement of tungsten oxide for tetrabromobisphenol A photodegradation under visible light illumination
Source: Royal Society of Chemistry journal article supplement (doi:10.1039/d3nj05274e), 2024-01-01
Supplement: d3nj05274e1.pdf [file d3nj05274e1.pdf]

## Supporting Information

# Structure induced activity enhancement of tungsten oxide for tetrabromobisphenol A photodegradation under visible light illumination

Shiman Zhou, Qianqian Zhu\*, Denan Li, Lifeng Zhang, Yanshuo Li\*, Zhenxin Zhang\*

<sup>a</sup> School of Materials Science and Chemical Engineering, Ningbo University, Ningbo 315211, China

<sup>b</sup> Zhejiang Hymater New Materials Co., Ltd. Ningbo, Zhejiang, 315034, P. R. China

\*Corresponding Author. E-mail: zhuqianqian@nbu.edu.cn (Q.Z.); E-mail: liyanshuo@nbu.edu.cn (Y.L.); E-mail: zhangzhenxin@nbu.edu.cn (Z.Z.)

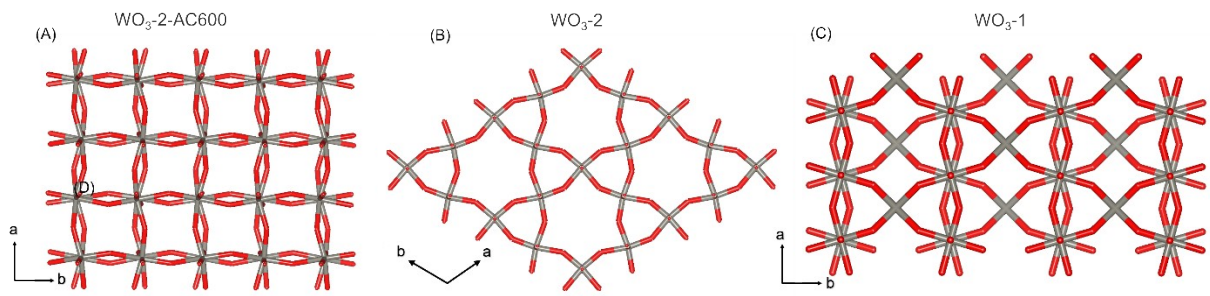

**Fig. S1**  $\text{WO}_3$  with different crystalline phases, (A) monoclinic, (B) hexagonal, and (C) orthorhombic, W (gray), O (red).

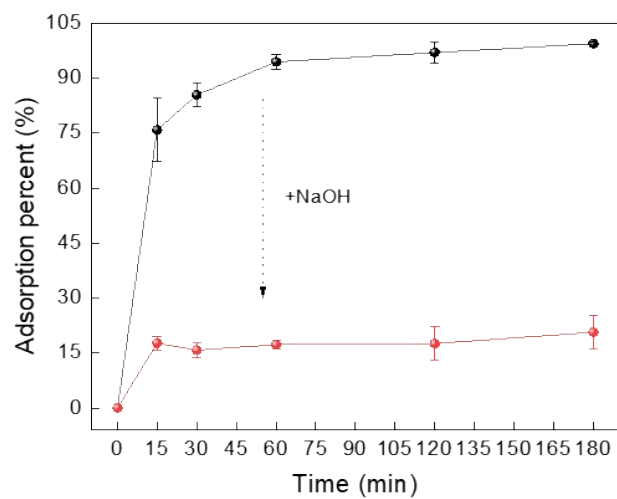

**Fig. S2** (black) Adsorption of TBBPA on  $\text{WO}_3$ -2-AC600 under dark at room temperature and (red) after adding NaOH solution. Adsorption conditions:  $[\text{TBBPA}]_0 = 50.0 \mu\text{mol/L}$ ,  $[\text{WO}_3]_0 = 0.5 \text{ g/L}$ ,  $[\text{NaOH}] = 10.0 \text{ mmol/L}$  and  $0.02 \text{ mol/L}$  buffer ( $\text{Na}_2\text{HPO}_4$ - $\text{NaH}_2\text{PO}_4$  at pH 8.2).

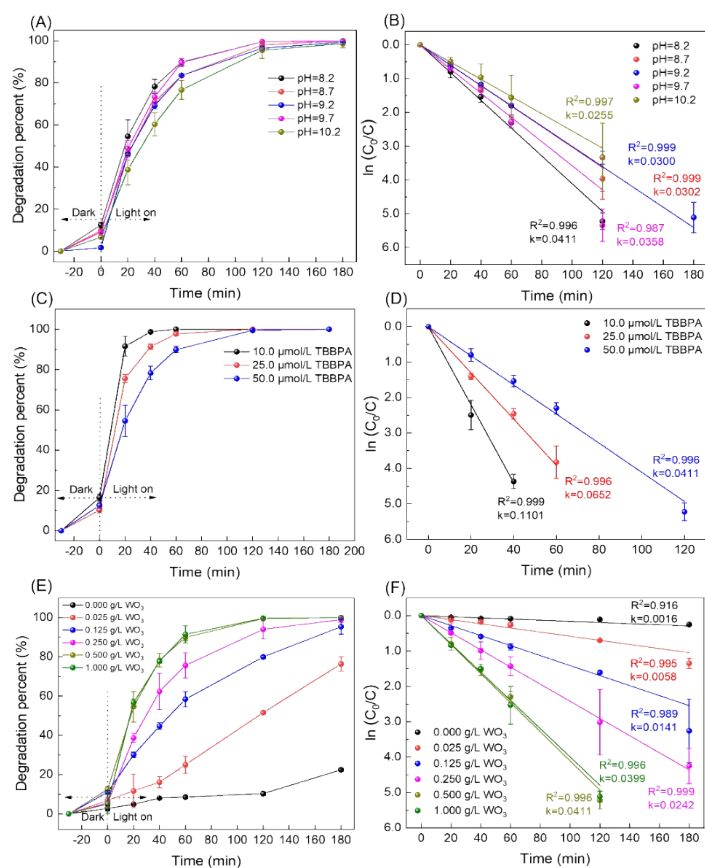

**Fig. S3** (A) Effect of initial pH on the TBBPA photodegradation and (B) pseudo-first order kinetic curves, reaction conditions:  $[TBBPA]_0 = 50.0 \mu\text{mol/L}$ ,  $[H_2O_2]_0 = 1.25 \text{ mmol/L}$ ,  $[WO_3]_0 = 0.500 \text{ g/L}$ , and  $0.02 \text{ mol/L}$  buffer ( $Na_2HPO_4$ - $NaH_2PO_4$  at pH 8.2-8.7,  $Na_2CO_3$ - $NaHCO_3$  at pH 9.2-10.2). (C) Effect of TBBPA concentration on the TBBPA photodegradation and (D) pseudo-first order kinetic curves, reaction conditions:  $[TBBPA]_0 = 10.0$ - $50.0 \mu\text{mol/L}$ ,  $[H_2O_2]_0 = 1.25 \text{ mmol/L}$ ,  $[WO_3]_0 = 0.500 \text{ g/L}$ , and  $0.02 \text{ mol/L}$  buffer ( $Na_2HPO_4$ - $NaH_2PO_4$  at pH 8.2). (E) Effect of the amount of  $WO_3$ -2-AC600 on the TBBPA photodegradation and (F) pseudo-first order kinetic curves, reaction conditions:  $[TBBPA]_0 = 50.0 \mu\text{mol/L}$ ,  $[H_2O_2]_0 = 1.25 \text{ mmol/L}$ ,  $[WO_3]_0 = 0.000$ - $1.000 \text{ g/L}$ , and  $0.02 \text{ mol/L}$  buffer ( $Na_2HPO_4$ - $NaH_2PO_4$  at pH 8.2).

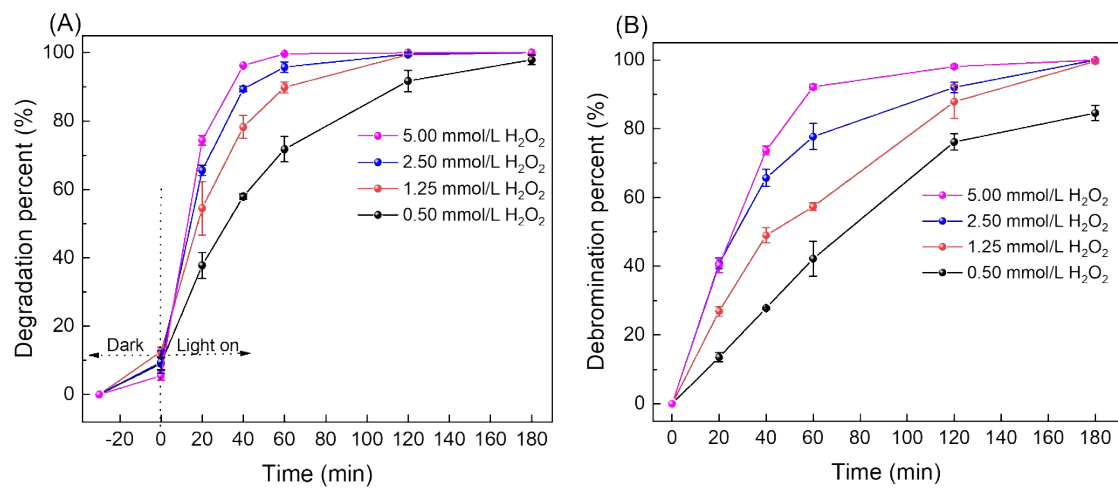

**Fig. S4** (A) Degradation percent and (B) debromination percent of TBBPA in different concentrations of H<sub>2</sub>O<sub>2</sub>, reaction conditions: [TBBPA]<sub>0</sub> = 50.0 μmol/L, [WO<sub>3</sub>]<sub>0</sub> = 0.500 g/L, and 0.02 mol/L buffer (Na<sub>2</sub>HPO<sub>4</sub>-NaH<sub>2</sub>PO<sub>4</sub> at pH 8.2).

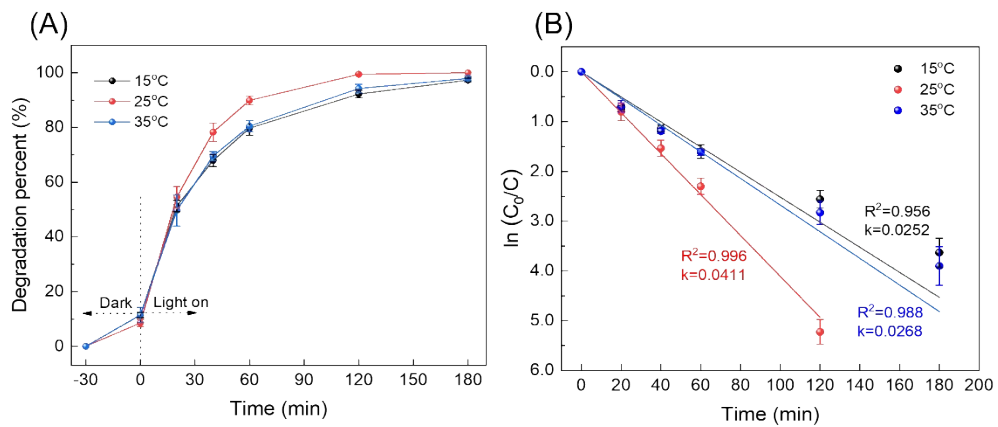

**Fig. S5** Degradation percent of TBBPPA at different temperatures, reaction conditions:  $[TBBPPA]_0 = 50.0 \mu\text{mol/L}$ ,  $[H_2O_2]_0 = 1.25 \text{ mmol/L}$ ,  $[WO_3]_0 = 0.5 \text{ g/L}$ , and  $0.02 \text{ mol/L}$  buffer ( $Na_2HPO_4$ - $NaH_2PO_4$  at pH 8.2).

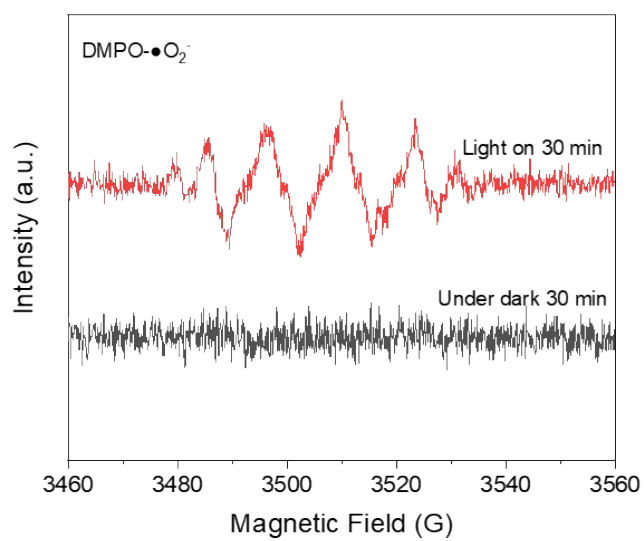

**Fig. S6** ESR profiles of TBBPA degradation using only  $\text{O}_2$  without peroxides using DMPO as radical capturer  $\bullet\text{O}_2^-$  in methanol.

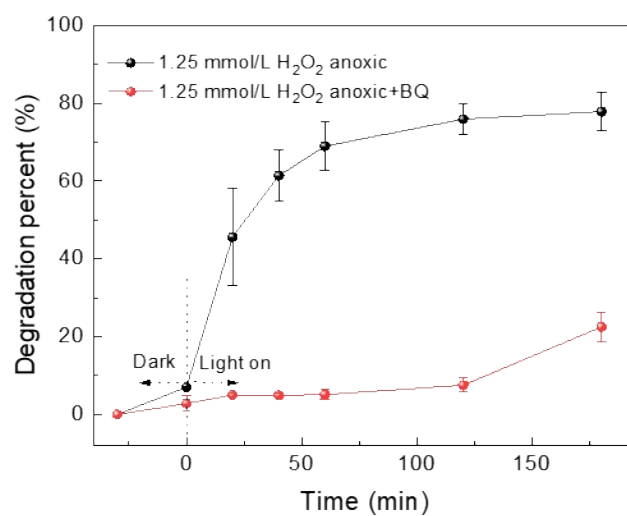

**Fig. S7** The degradation percent of TBBPA without air when BQ was added or not, reaction conditions:  $[TBBPA]_0 = 50.0 \mu\text{mol/L}$ ,  $[H_2O_2]_0 = 1.25 \text{ mmol/L}$ ,  $[BQ]_0 = 10.0 \text{ mmol/L}$ ,  $[WO_3]_0 = 0.500 \text{ g/L}$ , and  $0.02 \text{ mol/L}$  buffer ( $Na_2HPO_4$ - $NaH_2PO_4$  at pH 8.2).



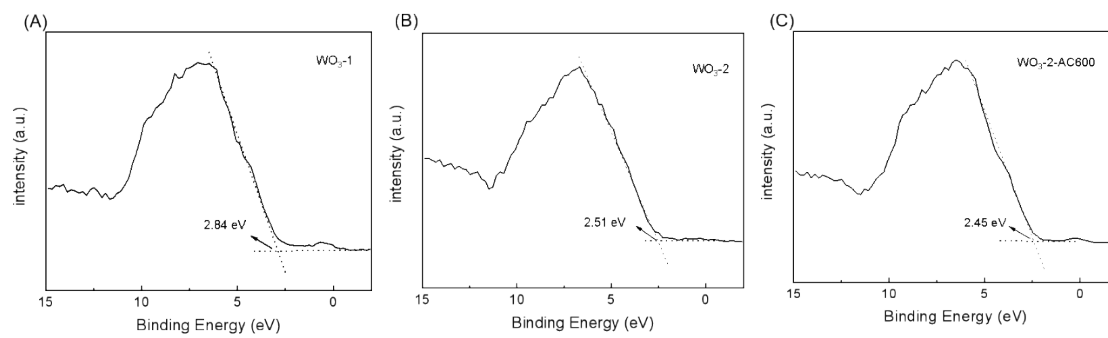

**Fig. S8** VB-XPS profiles of (A) WO<sub>3</sub>-1, (B) WO<sub>3</sub>-2, and (C) WO<sub>3</sub>-2-AC600

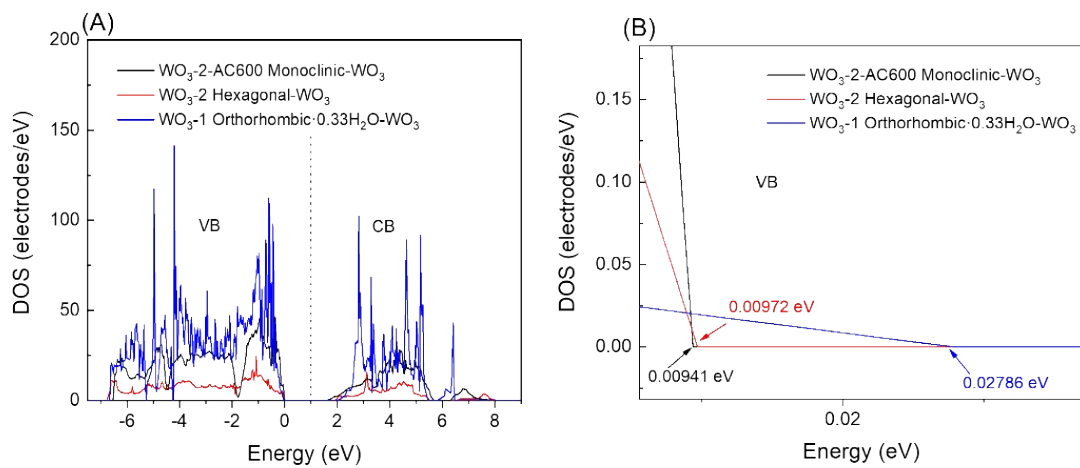

**Fig. S9** (A) DOS profiles of WO<sub>3</sub> with different crystalline structures and (B) enlarged DOS profiles.

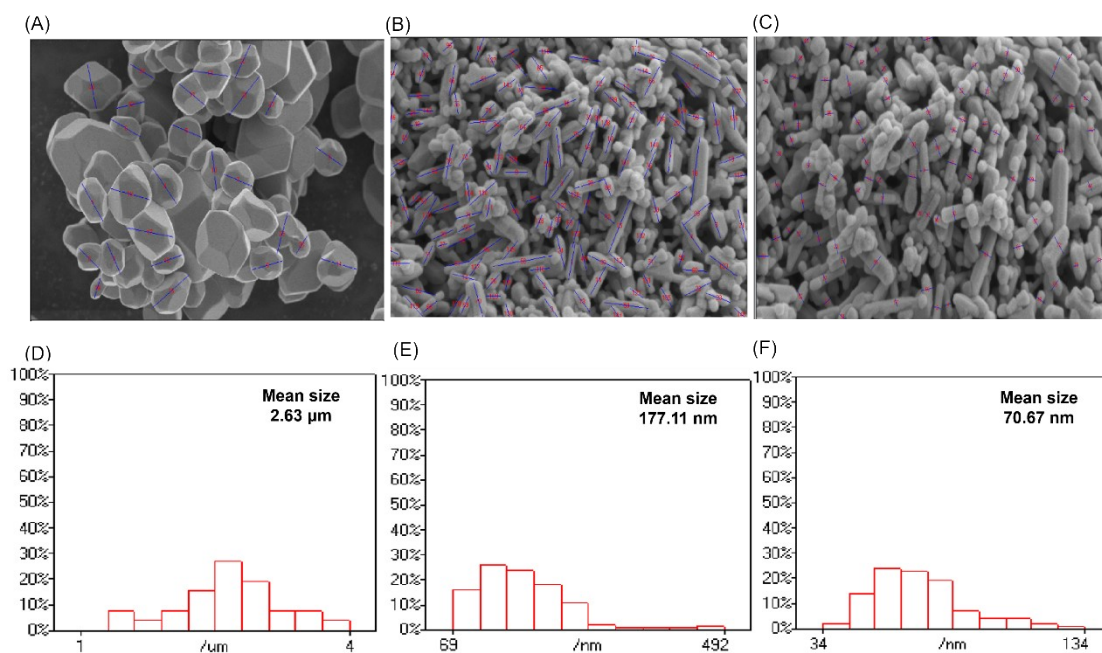

**Fig. S10** SEM images of (A)  $\text{WO}_3\text{-2-AC900}$  with selected diameters, (B)  $\text{WO}_3\text{-2-AC600}$  with selected length, (C)  $\text{WO}_3\text{-2-AC600}$  with selected diameter, particle size distribution of (D)  $\text{WO}_3\text{-2-AC900}$ , (E) length distribution of  $\text{WO}_3\text{-2-AC600}$ , and (F) diameter distribution of  $\text{WO}_3\text{-2-AC600}$ .

The method for estimating surface area of different monoclinic  $\text{WO}_3$

According to SEM images,  $\text{WO}_3\text{-2-AC600}$  was nanorod with different scales in diameter and length and  $\text{WO}_3\text{-2-AC900}$  was polyhedral with similar scales in each diameter.  $\text{WO}_3\text{-2-AC900}$  was regarded as a sphere, and the surface area was calculated based on  $S1 = 4\pi(r_1)^2/(4/3)\pi(r_1)^3\rho$ , where  $S1$  was catalyst surface area per unit mass of  $\text{WO}_3\text{-2-AC900}$ ,  $r_1$  was radius, and  $\rho$  was density of  $\text{WO}_3\text{-2-AC900}$ . Furthermore,  $\text{WO}_3\text{-2-AC600}$  was regarded as a cylinder, using the surface area calculation formula  $S2 = 2\pi r_2(r_2+h)/(\pi(r_2)^2h\rho)$  of the cylinder, where  $S2$  was catalyst surface area per unit mass of  $\text{WO}_3\text{-2-AC600}$ ,  $r_2$  was the radius of the cylinder, and  $h$  was the height of the cylinder.  $S2/S1=2r_1(r_2+h)/3r_2h$ . When  $r_1 = 1.315 \mu\text{m}$ ,  $r_2 = 35.335 \text{ nm}$ , and  $h = 177.11 \text{ nm}$ ,  $S1/S2 = 29.76$ . Therefore, the surface area of  $\text{WO}_3\text{-2-AC600}$  was estimated to be 29.76 times as high as that of  $\text{WO}_3\text{-2-AC900}$ .

Therefore, the dose of WO<sub>3</sub>-2-AC900 was 40 times as high as the dose of WO<sub>3</sub>-2-AC600 to ensure the surface area of the catalysts to be close for comparison. When the concentration of WO<sub>3</sub>-2-AC900 reached 1.000 g/L (Fig. S9), the degradation percent was about 70.3% after 180 min, and the degradation effect was still lower than that of 0.025 g/L WO<sub>3</sub>-2-AC600 (76.4%) (Fig. S2E).

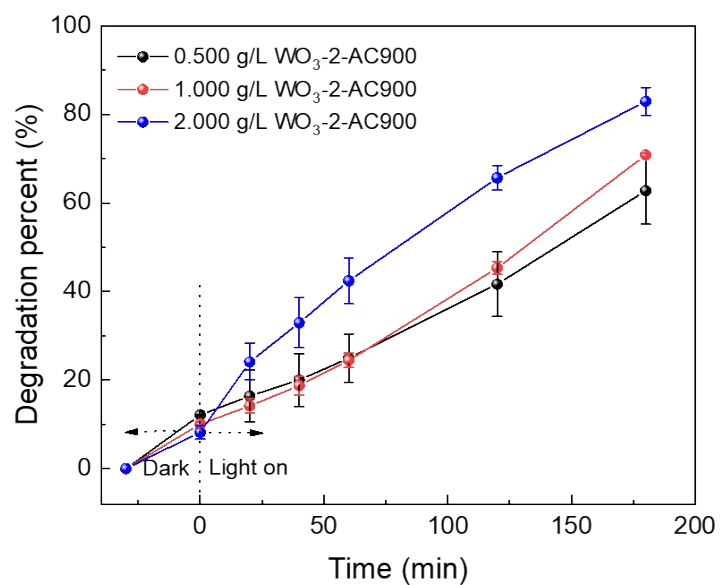

**Fig. S11** Effect of the amount of WO<sub>3</sub>-2-AC900 on the TBBPA photodegradation, reaction conditions: ([TBBPA]<sub>0</sub> = 50.0 μmol/L, [H<sub>2</sub>O<sub>2</sub>]<sub>0</sub> = 1.25 mmol/L, [WO<sub>3</sub>]<sub>0</sub> = 0.500-2.000 g/L, and 0.02 mol/L buffer (Na<sub>2</sub>HPO<sub>4</sub>-NaH<sub>2</sub>PO<sub>4</sub> at pH 8.2).

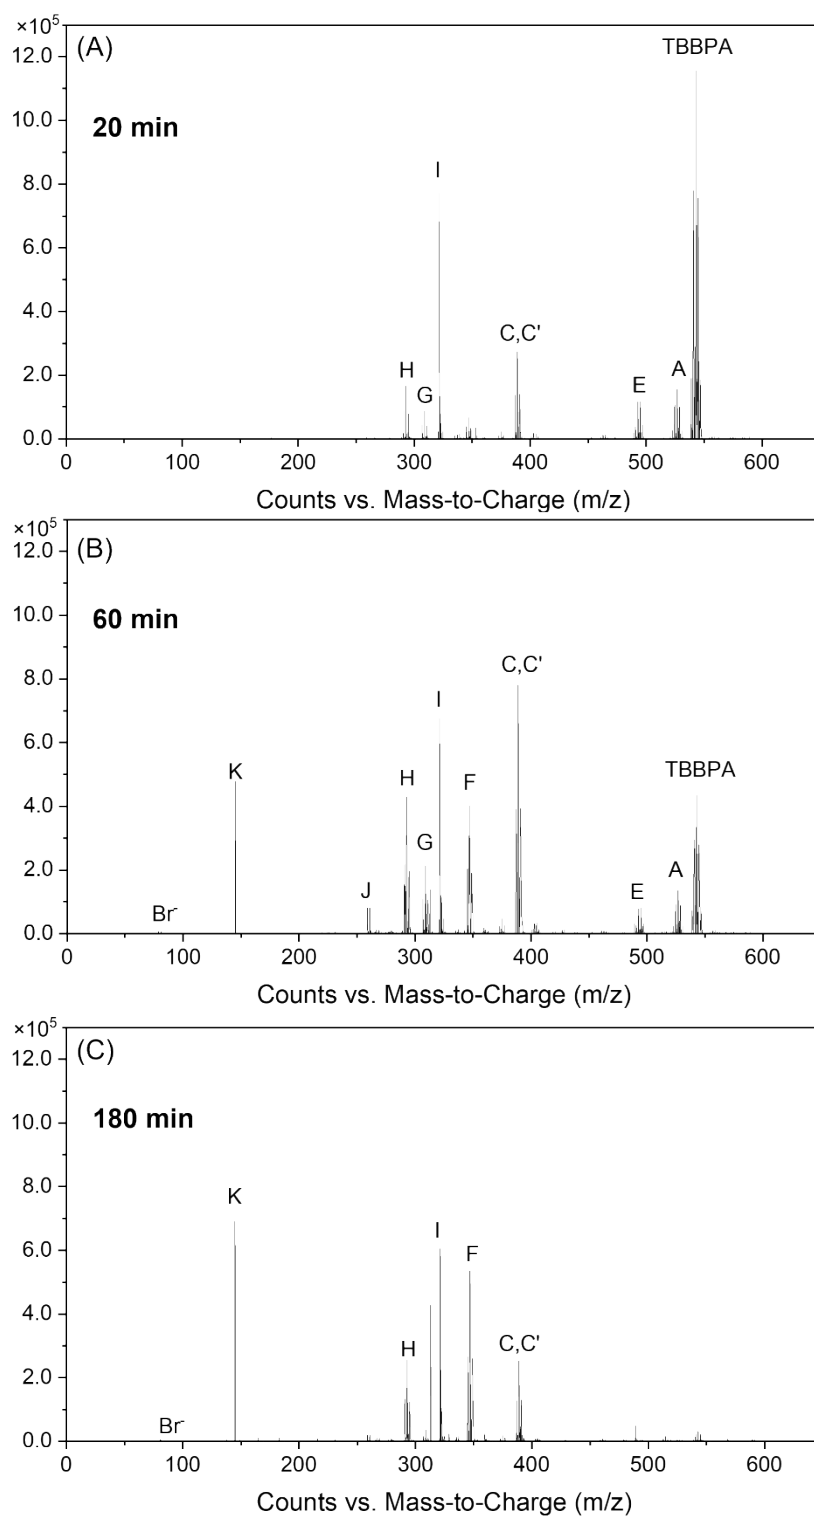

**Fig. S12** The HRMS profiles of the TBBPA degradation at (A) 20 min, (B) 60 min, and (C) 180 min.

**Table S1.** Results of the characterization of various WO<sub>3</sub> obtained by a hydrothermal method.

| Catalyst                 | Crystalline phase | BET Surface area (m <sup>2</sup> /g) | Bandgap energy<br>(eV) |
|--------------------------|-------------------|--------------------------------------|------------------------|
| WO <sub>3</sub> -1       | Orthorhombic      | 6.1                                  | 2.73                   |
| WO <sub>3</sub> -1-AC600 | Monoclinic        | 1.0                                  | 2.56                   |
| WO <sub>3</sub> -2       | Hexagonal         | 46.3                                 | 2.66                   |
| WO <sub>3</sub> -2-AC400 | Hexagonal         | 22.1                                 | 2.68                   |
| WO <sub>3</sub> -2-AC600 | Monoclinic        | 9.8                                  | 2.65                   |
| WO <sub>3</sub> -2-AC900 | Monoclinic        | <1.0                                 | 2.53                   |

**Table S2.** Comparisons of TBBPA degradation between the prepared composite and some previously reported catalysts.

| Catalyst                                            | Dosage<br>(g/L) | Light source                      | TBBPA<br>concentration<br>( $\mu\text{mol/L}$ ) | Time    | Efficiency (%) | Debromination<br>percent<br>(%) | Peroxide<br>(mmol/L)                    | References    |
|-----------------------------------------------------|-----------------|-----------------------------------|-------------------------------------------------|---------|----------------|---------------------------------|-----------------------------------------|---------------|
| WO <sub>3</sub> -1-AC600                            | 0.5             | 300 W xenon lamp                  | 50.0                                            | 180 min | 100.0          | 100.0                           | H <sub>2</sub> O <sub>2</sub><br>(1.25) | This work     |
| Fe <sub>3-x</sub> Ti <sub>x</sub> O <sub>4</sub>    | 0.125           | 6 W UV-light tube                 | 36.8                                            | 180 min | 92.1           | -                               | H <sub>2</sub> O <sub>2</sub><br>(10.0) | <sup>1</sup>  |
| TiO <sub>2</sub>                                    | 0.2             | 100 W high-pressure mercury lamp  | 91.9                                            | 120 min | 98.8           | -                               | KPS (2.0)                               | <sup>2</sup>  |
| Alkaline TiO <sub>2</sub>                           | 0.25            | 75 W high-pressure Hg lamp (UV)   | 41.7                                            | 120 min | 100.0          | 100.0                           | -                                       | <sup>3</sup>  |
| MoS <sub>2</sub> /SnIn <sub>4</sub> S <sub>8</sub>  | 0.5             | 300 W xenon lamp                  | 18.4                                            | 180 min | 89.1           | 50.0                            | -                                       | <sup>4</sup>  |
| ZnTMPyP                                             | 5.0             | 16 W LED lamps                    | 50.0                                            | 180 min | 84.0           | 32.0                            | -                                       | <sup>5</sup>  |
| Graphene-TiO <sub>2</sub>                           | 0.25            | 230 W Hg lamp                     | 18.4                                            | 60 min  | 95.5           | -                               | -                                       | <sup>6</sup>  |
| CuO/Ce <sub>2</sub> O <sub>3</sub>                  | 0.5             | 500 W Xenon lamp                  | 9.2                                             | 120 min | 80.46          | -                               | -                                       | <sup>7</sup>  |
| F-TiO <sub>2</sub> -g-C <sub>3</sub> N <sub>4</sub> | 0.5             | 300 W Xenon lamp                  | 18.4                                            | 120 min | 95.0           | -                               | -                                       | <sup>8</sup>  |
| BiOBr                                               | 0.5             | 800 W xenon lamp                  | 1.84                                            | 60 min  | 100.0          | -                               | -                                       | <sup>9</sup>  |
| tourmaline-TiO <sub>2</sub>                         | 1.0             | 500W medium pressure mercury lamp | 18.4                                            | 60 min  | 100.0          | -                               | -                                       | <sup>10</sup> |
| MIP@C-Fe-Nx                                         | 0.5             | -                                 | 18.4                                            | 90 min  | 100.0          | -                               | PS (1.26)                               | <sup>11</sup> |
| CuFe <sub>2</sub> O <sub>4</sub>                    | 0.1             | -                                 | 18.4                                            | 180 min | 100.0          | 67.0                            | PMS (1.5)                               | <sup>12</sup> |
| nZVI                                                | 3.0             | -                                 | 9.2                                             | 12 h    | 78.32          | -                               | PS (25.0)                               | <sup>13</sup> |



|                                                               |                   |   |      |         |      |      |                                     |    |
|---------------------------------------------------------------|-------------------|---|------|---------|------|------|-------------------------------------|----|
| FeTPPS                                                        | 5.0               | - | 50.0 | 30 min  | 95.0 | 0    | PMS                                 | 14 |
|                                                               | $\mu\text{mol/L}$ |   |      |         |      |      | (0.125)                             |    |
| Fe <sub>3</sub> O <sub>4</sub> /MWCNT                         | 0.5               | - | 18.4 | 180 min | 90.2 | -    | H <sub>2</sub> O <sub>2</sub> (0.1) | 15 |
| Fe <sup>3+</sup> /S <sub>2</sub> O <sub>4</sub> <sup>2-</sup> | 200.0             | - | 1.0  | 60 min  | 93.8 | 83.9 | PS (0.2)                            | 16 |
|                                                               | $\mu\text{mol/L}$ |   |      |         |      |      |                                     |    |

KPS: K<sub>2</sub>S<sub>2</sub>O<sub>8</sub>; PMS: KHSO<sub>5</sub>; PS: S<sub>2</sub>O<sub>4</sub><sup>2-</sup>

**Table S3.** Toxicity evaluation of Intermediate to Fathead minnow.

| Intermediate | Chemical structure                                                                  | LC50 (mg/L) For Fathead minnow |
|--------------|-------------------------------------------------------------------------------------|--------------------------------|
| TBBPA        | 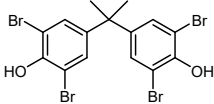   | 0.045                          |
| A            |    | 0.0452                         |
| B            |    | 0.18                           |
| B'           |    | 0.18                           |
| C            |   | 0.13                           |
| C'           |  | 0.19                           |
| D            |  | 0.10                           |
| E            |  | 0.13                           |
| G            |  | 3.5                            |
| H            |  | 1.61                           |
| J            |  | N/A                            |

|   |                                                                                   |     |
|---|-----------------------------------------------------------------------------------|-----|
| K | 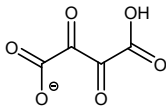 | N/A |
|---|-----------------------------------------------------------------------------------|-----|

#### Reference:

- 1 Y. Zhong, X. Liang, Y. Zhong, J. Zhu, S. Zhu, P. Yuan, H. He and J. Zhang, *Water Res.*, 2012, **46**, 4633–4644.
- 2 Q. Li, L. Wang, L. Zhang and H. Xie, *Res. Chem. Intermed.*, 2019, **45**, 757–768.
- 3 S. Horikoshi, T. Miura, M. Kajitani, N. Horikoshi and N. Serpone, *Appl. Catal. B Environ.*, 2008, **84**, 797–802.
- 4 R. Weng, F. Tian, Z. Yu, J. Ma, Y. Lv and B. Xi, *Chemosphere*, 2021, **285**, 131542.
- 5 Q. Zhu, M. Igarashi, M. Sasaki, T. Miyamoto, R. Kodama and M. Fukushima, *Appl. Catal. B Environ.*, 2016, **183**, 61–68.
- 6 M. Cao, P. Wang, Y. Ao, C. Wang, J. Hou and J. Qian, *Chem. Eng. J.*, 2015, **264**, 113–124.
- 7 A. Zhu, P. Liu, Z. Wang, Z. Liu, A. Liu and L. Guan, *J. Environ. Chem. Eng.*, 2022, **10**, 108878.
- 8 P. Chen, S. Di, X. Qiu and S. Zhu, *Appl. Surf. Sci.*, 2022, **587**, 152889.
- 9 J. Xu, W. Meng, Y. Zhang, L. Li and C. Guo, *Appl. Catal. B Environ.*, 2011, **107**, 355–362.
- 10 N. Li, J. Zhang, C. Wang and H. Sun, *J. Mater. Sci.*, 2017, **52**, 6937–6949.
- 11 C. Zeng, Y. Wang, T. Xiao, Z. Yan, J. Wan and Q. Xie, *J. Hazard. Mater.*, 2022, **424**, 127499.
- 12 Y. Ding, L. Zhu, N. Wang and H. Tang, *Appl. Catal. B Environ.*, 2013, **129**, 153–162.
- 13 X. Yuan, T. Li, Y. He and N. Xue, *Chemosphere*, 2021, **284**, 131166.
- 14 Q. Zhu, Y. Mizutani, S. Maeno and M. Fukushima, *Molecules*, 2013, **18**, 5360–5372.
- 15 L. Zhou, H. Zhang, L. Ji, Y. Shao and Y. Li, *RSC Adv.*, 2014, **4**, 24900.
- 16 W. Song, M. Li, S. Xu, Z. Wang, J. Li, X. Zhang, W. Qiu, Z. Wang, Q. Song, K. Bhatt and C. Fu, *Environ. Pollut.*, 2023, **316**, 120579.
